# Supplementary material for: Mutual Effects of Hydrogen Bonding and Polymer Hydrophobicity on Ibuprofen Crystal Inhibition in Solid Dispersions with Poly(N-vinyl pyrrolidone) and Poly(2-oxazolines)
Source: MDPI journal article supplement (doi:10.3390/pharmaceutics13050659), 2021-05-04
Supplement: s1 [file s1]

# Supplementary Materials: Mutual Effects of Hydrogen Bonding and Polymer Hydrophobicity on Ibuprofen Crystal Inhibition in Solid Dispersions with Poly(*N*-vinyl pyrrolidone) and Poly(2-oxazolines)

Xiaoning Shan, Maryam A. Moghul, Adrian C. Williams and Vitaliy V. Khutoryanskiy

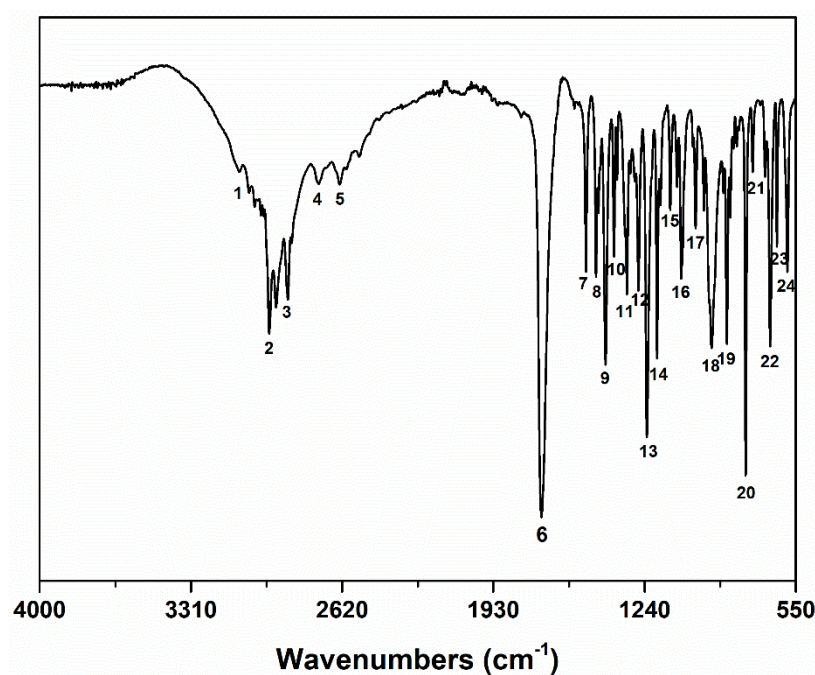

Figure S1. FTIR of ibuprofen.

(a)

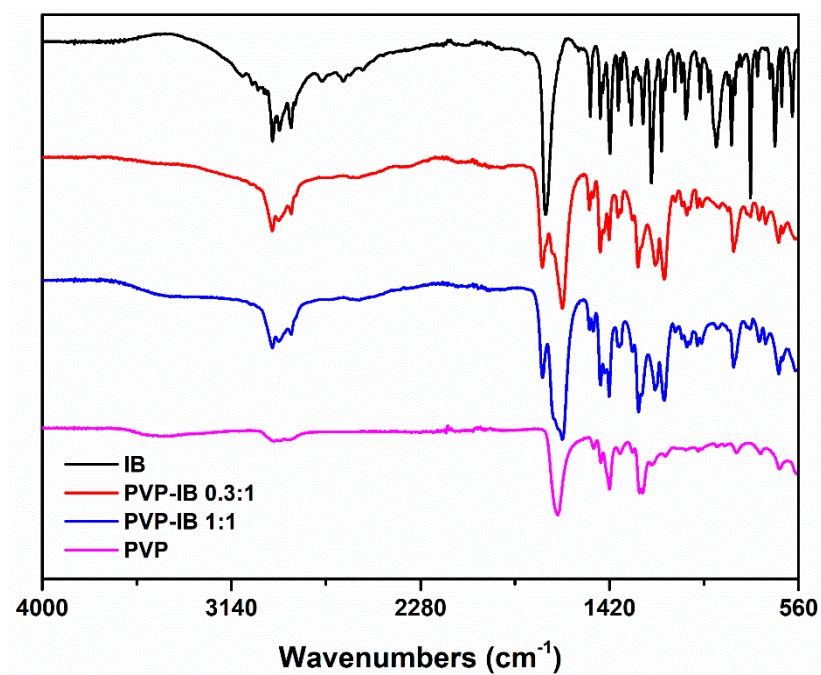

(b)

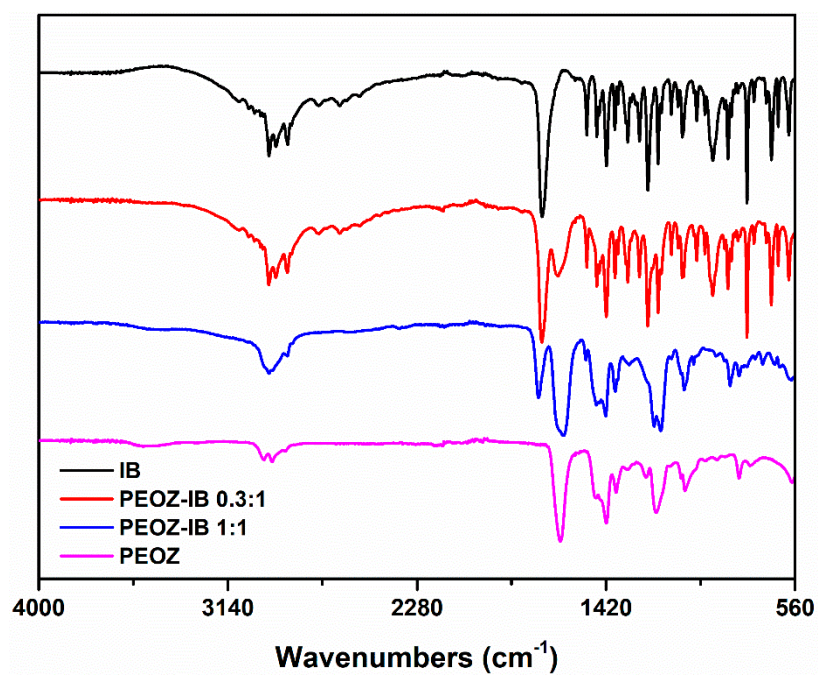

(c)

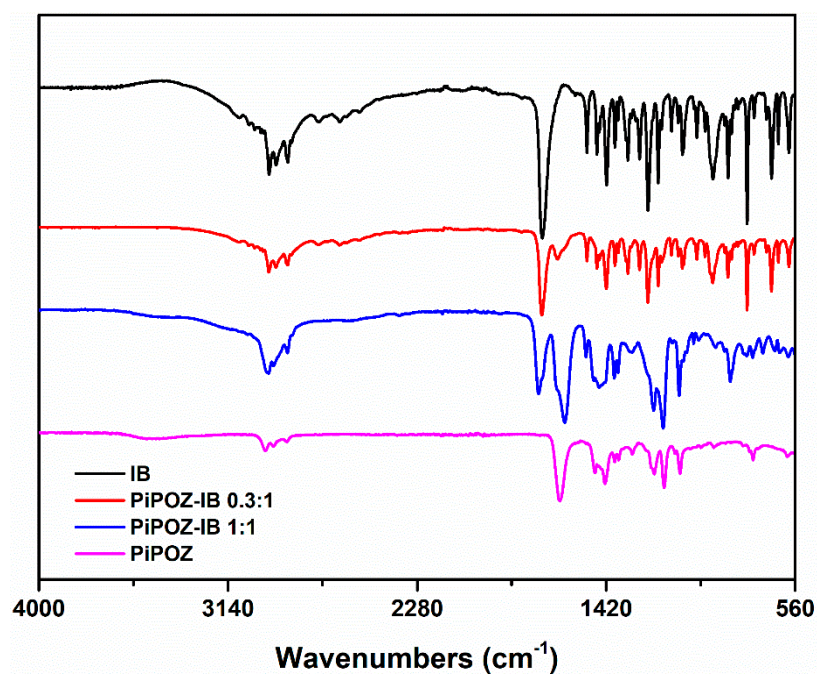

(d)

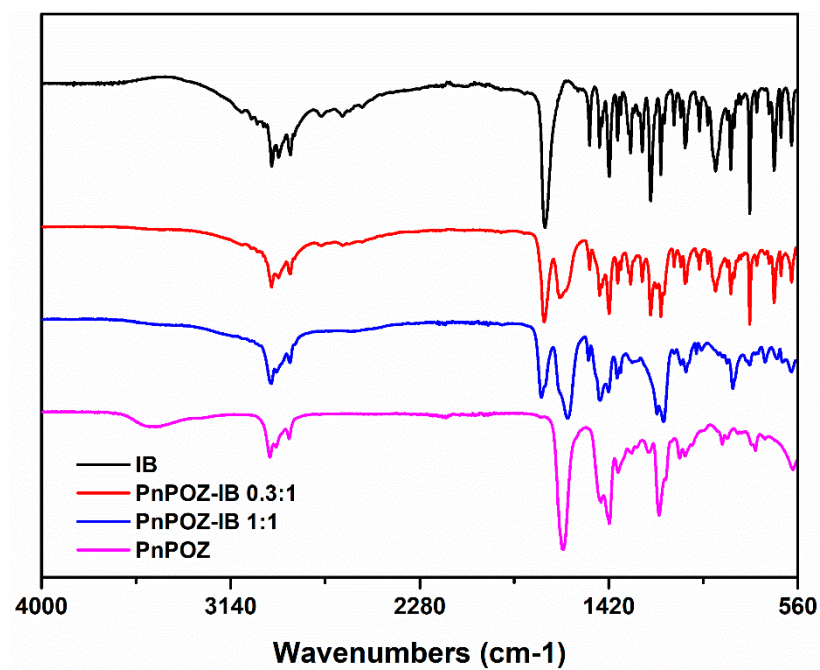

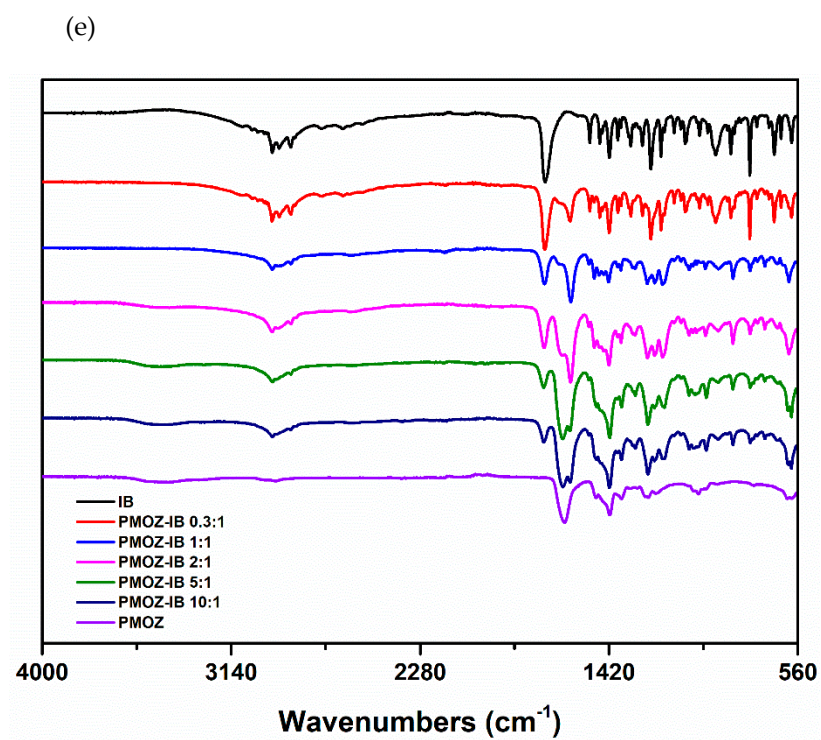

**Figure S2.** FTIR full spectra of PVP-IB SDs (a), PEOZ-IB SDs (b), PnPOZ-IB SDs (c), PiPOZ-IB SDs (d) and PMOZ-IB SDs (e).



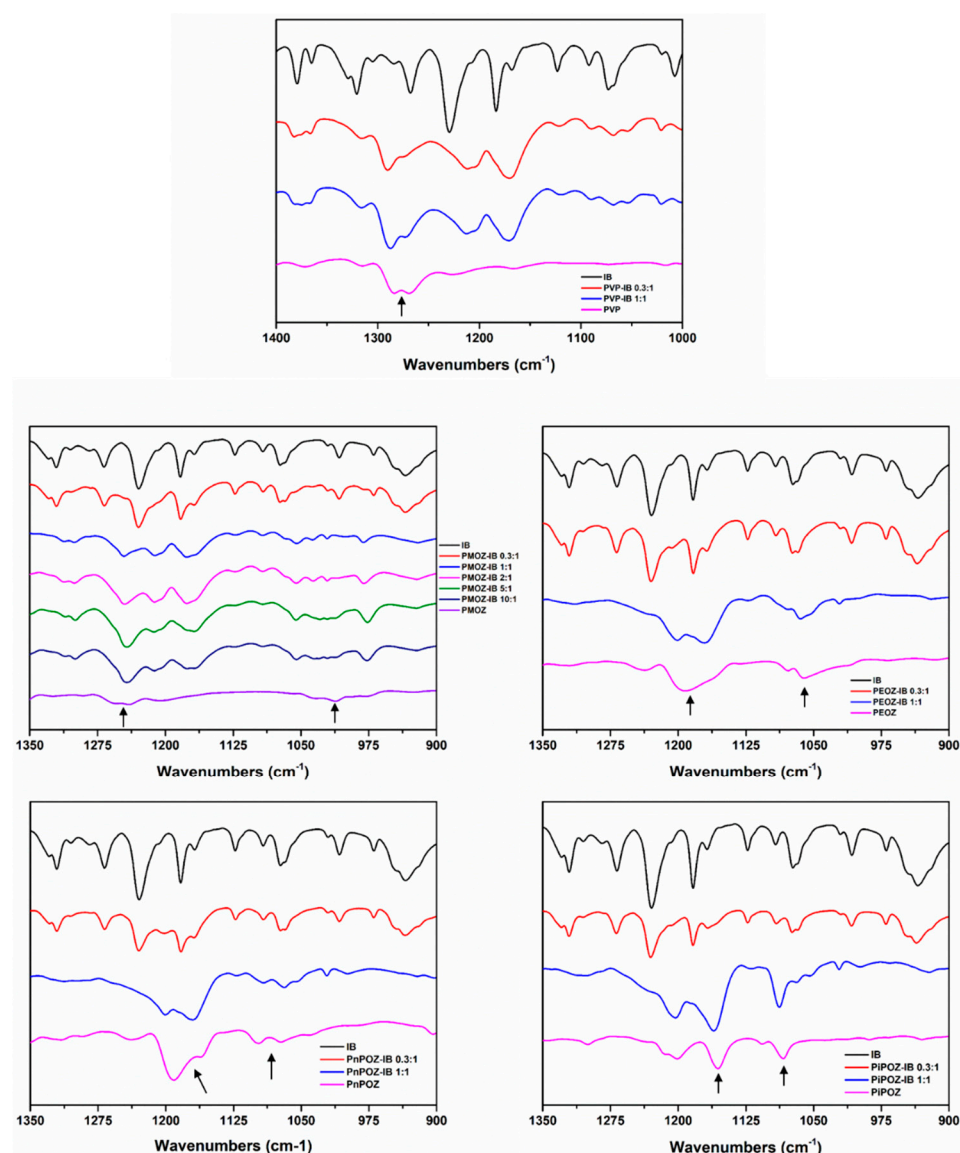

**Figure S3.** FTIR spectra of PVP-IB SDs and POZ-IB SDs in the range of 1400~900  $\text{cm}^{-1}$ . The peaks (marked with an arrow) are attributed to C–N mode.

**Table S1.** FTIR spectral data of ibuprofen (s- strong; w- weak; sym-symmetrical; asym-asymmetrical; str-stretching; m-medium; vs- very strong; vw – very weak.).

| Band | Wavenumbers ( $\text{cm}^{-1}$ ) | Assignments                                              |
|------|----------------------------------|----------------------------------------------------------|
| 1    | 3088 m                           | $\text{CH}_2$ asym str                                   |
| 2    | 2955 vs                          | $\text{CH}_3$ asym str                                   |
| 3    | 2869 m                           | $\text{CH}_2$ sym str                                    |
| 4    | 2725 m                           | O–H...O valence str                                      |
| 5    | 2633 m                           | O–H...O valence str                                      |
| 6    | 1710 vs                          | C=O str                                                  |
| 7    | 1507 s                           | aromatic C=C str                                         |
| 8    | 1462 s                           | $\text{CH}_3$ asym deformation, $\text{CH}_2$ scissoring |
| 9    | 1416 s                           | CH–CO deformation                                        |
| 10   | 1380 s                           | $\text{CH}_3$ sym str                                    |
| 11   | 1320 s                           | OH in plane deformation                                  |
| 12   | 1268 s                           | =C–H in plane deformation                                |
| 13   | 1230 vs                          | C...C str                                                |
| 14   | 1183 s                           | C–O str                                                  |

|    |        |                                        |
|----|--------|----------------------------------------|
| 15 | 1123 w | =C–H in plane deformation              |
| 16 | 1071 m | =C–H in plane deformation              |
| 17 | 1008 m | C–H in plane deformation               |
| 18 | 936 s  | CH <sub>3</sub> rocking vibration      |
| 19 | 866 s  | C–H out of plane vibration             |
| 20 | 779 s  | CH <sub>2</sub> rocking                |
| 21 | 746 w  | C=C ring str, C...C skeletal vibration |
| 22 | 668 s  | C–H out of plane deformation           |
| 23 | 636 w  | C–H in plane ring deformation          |
| 24 | 588 m  | C...C deformation                      |
